# Supplementary material for: A hierarchical structure of a Co0.85Se@NC/ZnSe@NC yolk-double-shell polyhedron for long-term lithium storage
Source: Royal Society of Chemistry journal article supplement (doi:10.1039/d1nr00174d), 2021-01-01
Supplement: d1nr00174d1.pdf [file d1nr00174d1.pdf]

**A hierarchical structure of  $\text{Co}_{0.85}\text{Se}@NC/\text{ZnSe}@NC$  yolk-double-shell polyhedron for long-term lithium storage**

Meng Cao, Hanqing Pan, Wanshu Luo, Qingqing Wang, Yinglan Ma, Ying Wang,\* Chao Wang\*

*E-mail: yingwang@jsnu.edu.cn, wangc@jsnu.edu.cn*

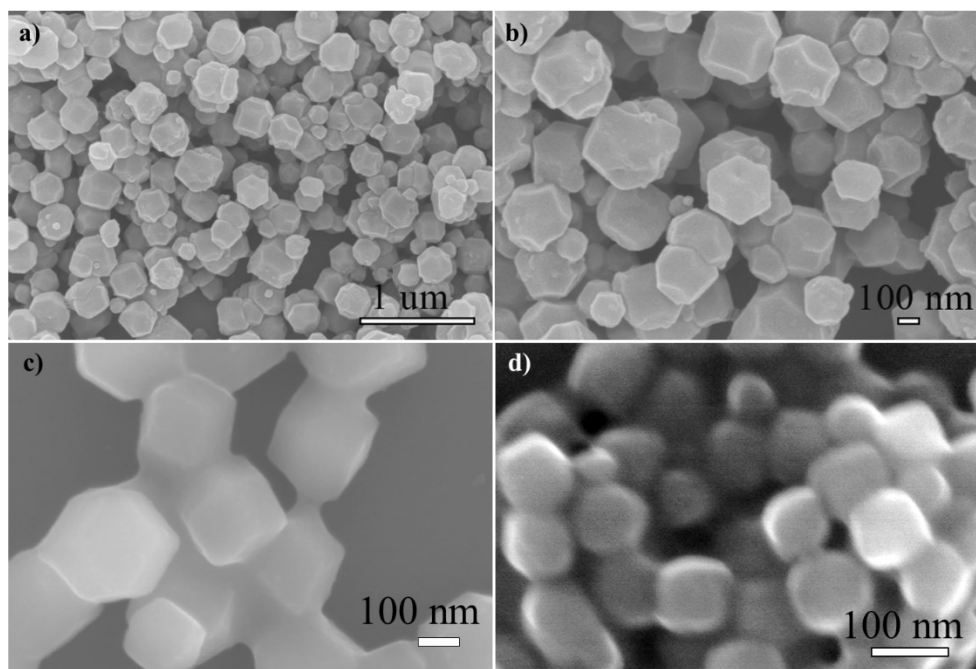

**Fig. S1.** SEM images of the (a, b) Co-ZIF, (c) Zn-ZIF, (d) ZnCo-ZIF.

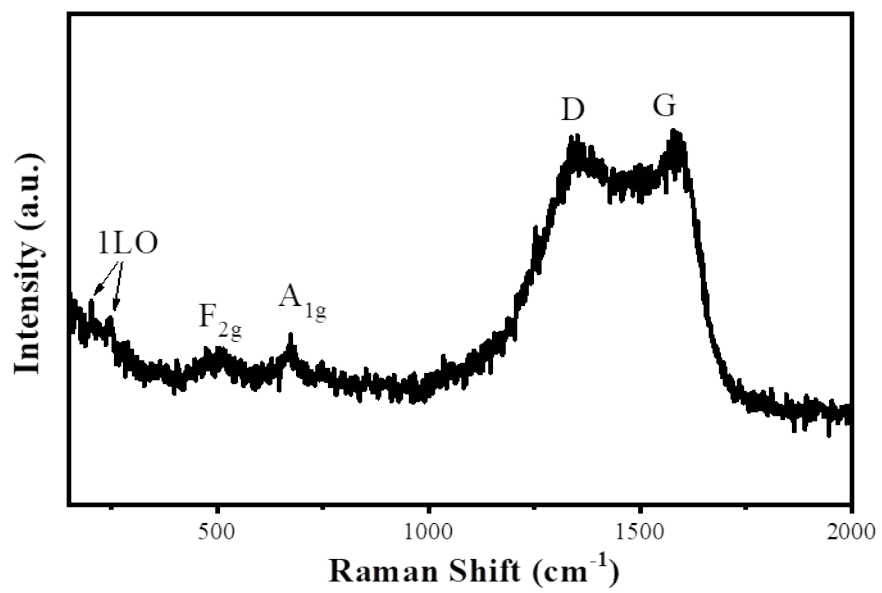

**Fig. S2.** Raman plot of the final  $\text{Co}_{0.85}\text{Se}@NC/\text{ZnSe}@NC\text{-YDS}$ .

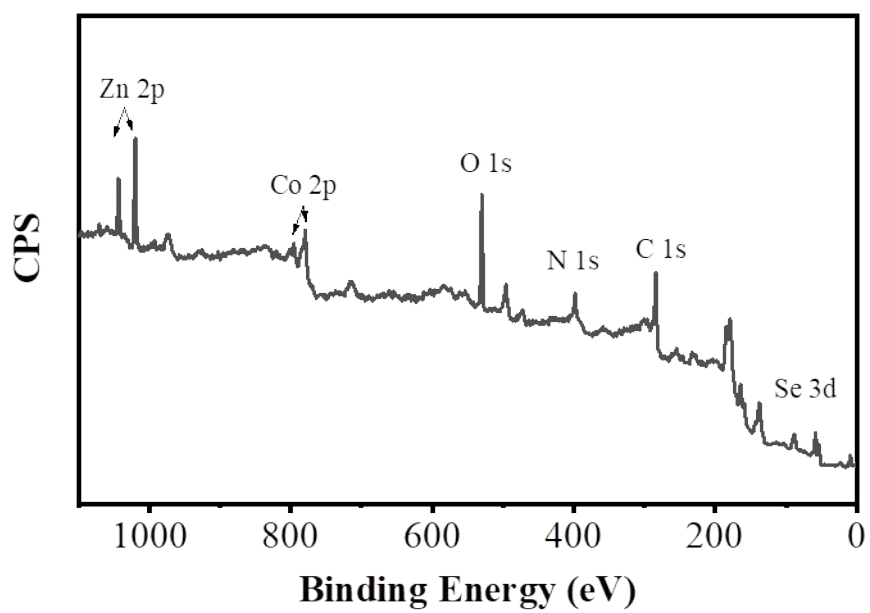

**Fig. S3.** XPS survey of the  $\text{Co}_{0.85}\text{Se@NC/ZnSe@NC-YDS}$ .

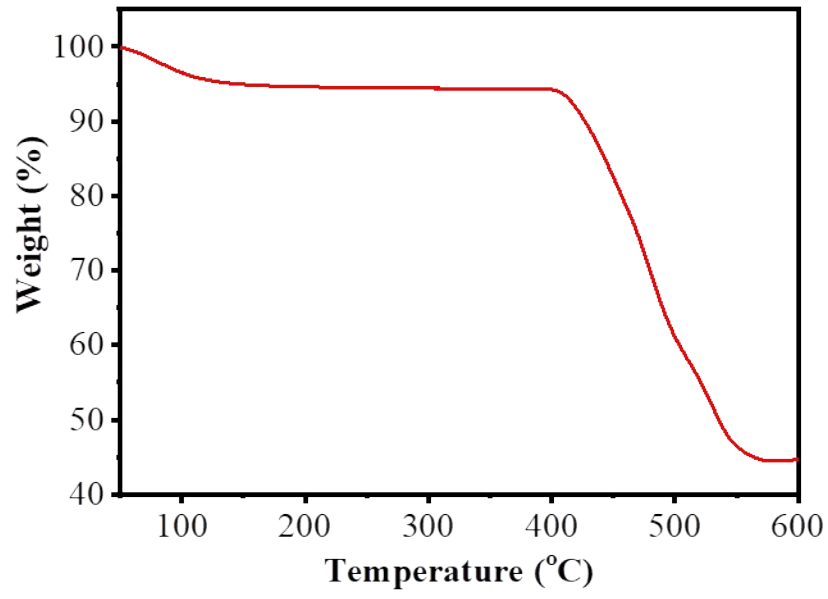

**Fig. S4.** TG curves of the Co<sub>0.85</sub>Se@NC/ZnSe@NC-YDS, performed in air with a ramp of 10 °C min<sup>-1</sup>.

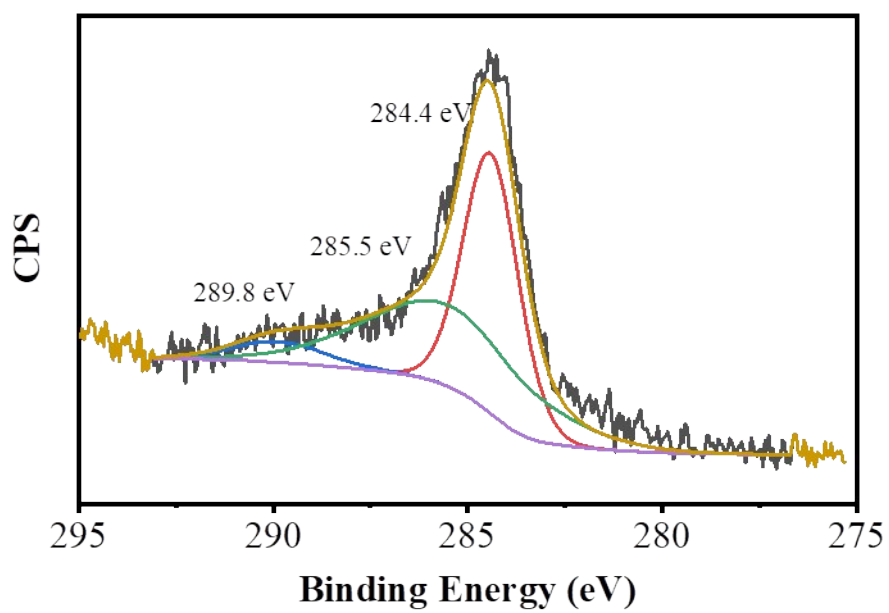

**Fig. S5.** High resolution C1s spectrum of the Co<sub>0.85</sub>Se@NC/ZnSe@NC-YDS.

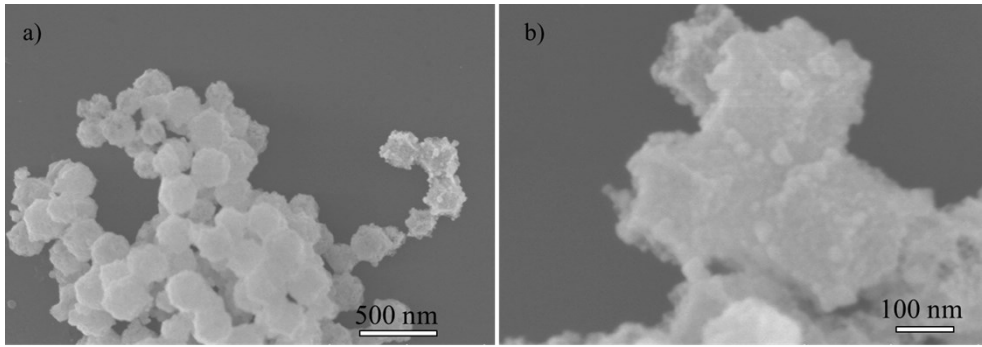

**Fig. S6** SEM images of the Zn-ZIF derived ZnSe@NC

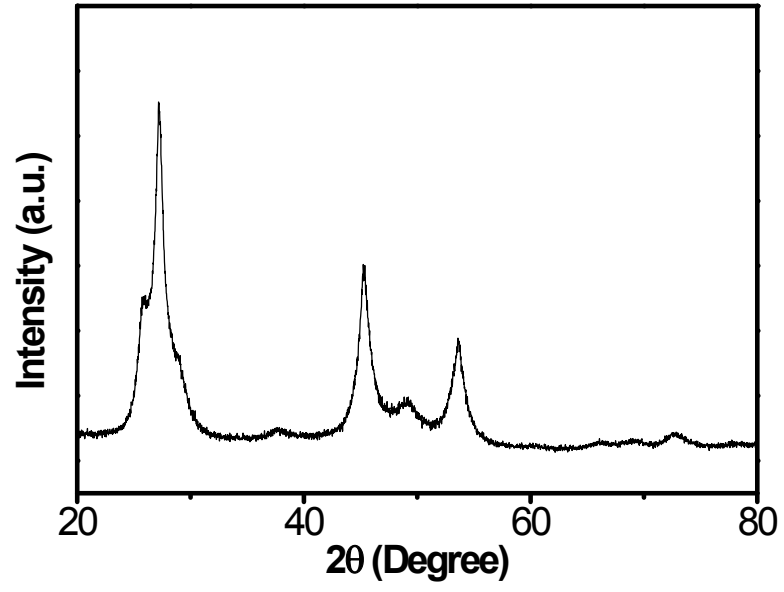

**Fig. S7** XRD pattern for the Zn-ZIF derived ZnSe@NC



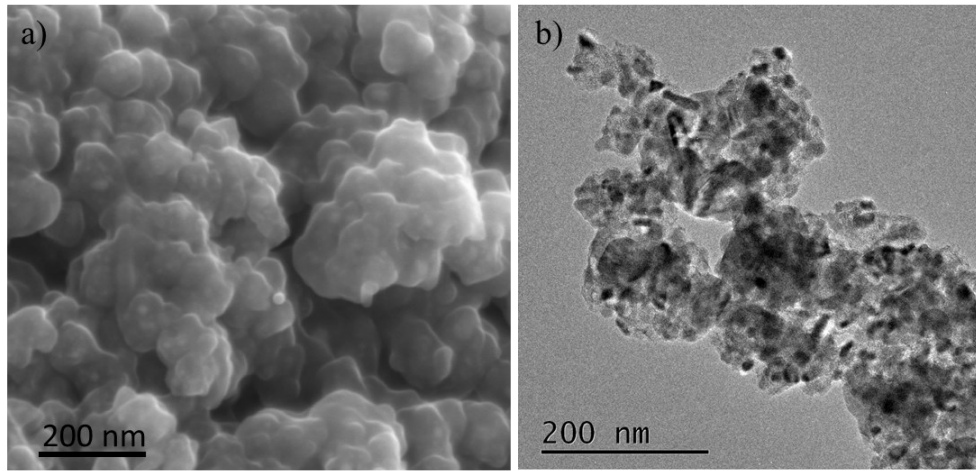

**Fig. S8** (a) SEM and (b) TEM images of the ZnCo-ZIF derived  $\text{Co}_{0.85}\text{Se}@\text{NC}/\text{ZnSe}@\text{NC}$

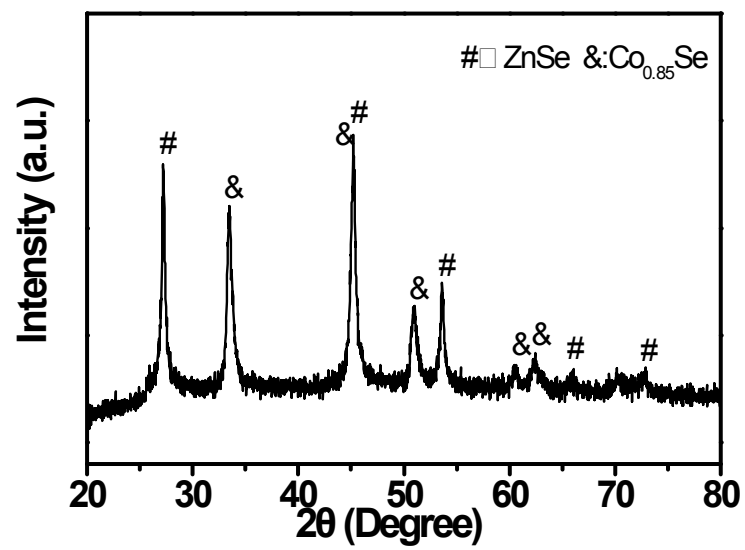

**Fig. S9** XRD pattern of the ZnCo-ZIF derived  $\text{Co}_{0.85}\text{Se}@NC/\text{ZnSe}@NC$ .

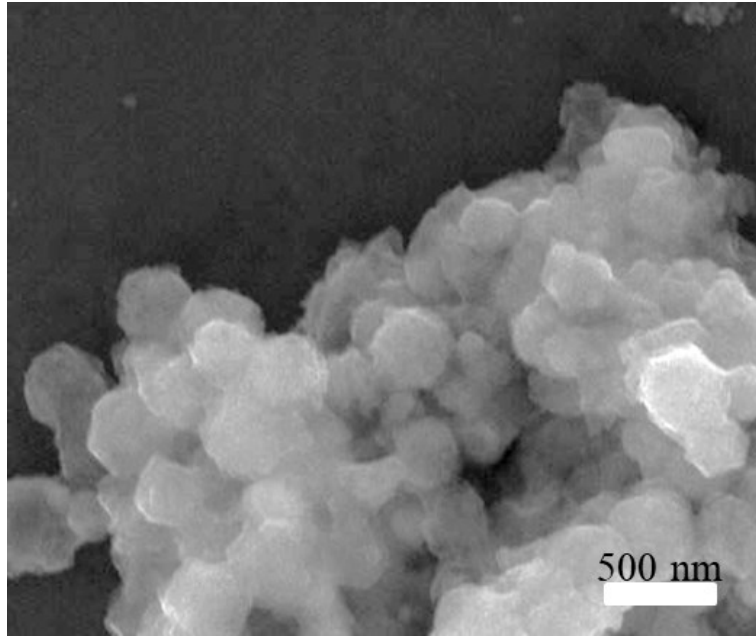

**Fig. S10.** SEM images of the after cycled  $\text{Co}_{0.85}\text{Se}@NC/\text{ZnSe}@NC\text{-YDS}$  sample.
